## Clinical Investigations

**‘Alveolar recruitment strategy’ improves arterial oxygenation during general anaesthesia**G. Tusman<sup>1\*</sup>, S. H. Böhm, G. F. Vazquez de Anda<sup>2</sup>, J. L. do Campo<sup>3</sup> and B. Lachmann<sup>2\*</sup><sup>1</sup>Department of Anaesthesiology, and <sup>3</sup>Department of Internal Medicine, Hospital Privado de Comunidad, Cordoba 4545, 7600 Mar del Plata, Argentina. <sup>2</sup>Department of Anaesthesiology (Room 2393), Erasmus University Rotterdam, Postbox 1738, 3000 DR Rotterdam, The Netherlands*\*To whom correspondence should be addressed*

Abnormalities in gas exchange during general anaesthesia are caused partly by atelectasis. Inspiratory pressures of approximately 40 cm H<sub>2</sub>O are required to fully re-expand healthy but collapsed alveoli. However, without PEEP these re-expanded alveoli tend to collapse again. We hypothesized that an initial increase in pressure would open collapsed alveoli; if this inspiratory recruitment is combined with sufficient end-expiratory pressure, alveoli will remain open during general anaesthesia. We tested the effect of an ‘alveolar recruitment strategy’ on arterial oxygenation and lung mechanics in a prospective, controlled study of 30 ASA II or III patients aged more than 60 yr allocated to one of three groups. Group ZEEP received no PEEP. The second group received an initial control period without PEEP, and then PEEP 5 cm H<sub>2</sub>O was applied. The third group received an increase in PEEP and tidal volumes until a PEEP of 15 cm H<sub>2</sub>O and a tidal volume of 18 ml kg<sup>-1</sup> or a peak inspiratory pressure of 40 cm H<sub>2</sub>O was reached. PEEP 5 cm H<sub>2</sub>O was then maintained. There was a significant increase in median Pa<sub>O<sub>2</sub></sub> values obtained at baseline (20.4 kPa) and those obtained after the recruitment manoeuvre (24.4 kPa) at 40 min. This latter value was also significantly higher than Pa<sub>O<sub>2</sub></sub> measured in the PEEP (16.2 kPa) and ZEEP (18.7 kPa) groups. Application of PEEP also had a significant effect on oxygenation; no such intra-group difference was observed in the ZEEP group. No complications occurred. We conclude that during general anaesthesia, the alveolar recruitment strategy was an efficient way to improve arterial oxygenation.

*Br J Anaesth* 1999; **82**: 8–13**Keywords:** anaesthesia, general; lung, atelectasis; lung, mechanics; oxygen, partial pressure

Accepted for publication: August 19, 1998

It is well established that general anaesthesia in the adult patient may be associated with arterial hypoxaemia.<sup>1</sup> In 1963, Bendixen, Hedley-Whyte and Laver suggested that intraoperative atelectasis was the major cause of alterations in gas exchange.<sup>2</sup> Others have shown atelectasis within 5 min of the onset of anaesthesia which did not increase further.<sup>3</sup> The amount of atelectasis on CT scan correlated with the amount of intrapulmonary shunt and it was concluded that alveolar collapse and ventilation/perfusion mismatching were the main reasons for the poor gas exchange during general anaesthesia.<sup>4–6</sup> These findings were supported by lung histology in anaesthetized sheep.<sup>7</sup>

Lachmann suggested a strategy to open atelectatic lungs by sufficient inspiratory pressures and keeping them open by sufficient PEEP.<sup>8</sup> He suggested that a treatment that

combined an initial pressure increase beyond the opening pressures of collapsed alveoli with enough PEEP to stabilize the newly opened units would reduce atelectasis and improve lung compliance. When the lung available for gas exchange is increased, abnormalities of arterial oxygenation would be seen less frequently.<sup>9</sup> Gunnarsson and colleagues studied how age affected the formation of atelectasis and gas exchange impairment during general anaesthesia and found that young patients were more prone to atelectasis and intrapulmonary shunting than older patients. Provided they were measurable, the effects of our ‘alveolar recruitment strategy’ should then be detectable even in an older patient population with a known low risk for the formation of atelectasis but pronounced ventilation/perfusion mismatching.<sup>10</sup>

In this low-risk population, a good response to the recruitment manoeuvre would suggest that further investigations of the postoperative benefits and risks of the manoeuvre are warranted, especially for patients with lungs that are particularly prone to collapse such as during upper abdominal, laparoscopic or thoracic surgery.

We have tested the impact of a simple 'alveolar recruitment strategy' on arterial oxygenation and lung mechanics of patients undergoing general anaesthesia for more than 2 h. Additionally, the frequency and extent of haemodynamic changes and other complications were monitored.

## Patients and methods

The study was conducted at the Hospital Privado de Comunidad in Mar del Plata, Argentina, after obtaining approval from the Local Ethics Committee and written informed consent from each patient. Preliminary investigations indicated that 30 patients would be required. Patients older than 60 yr of age, classified as ASA II-III, were randomized prospectively to one of three groups of 10 by opening sealed envelopes. We recruited patients undergoing elective operations not expected to directly affect the thorax or the position of the diaphragm. Patients undergoing thoracic, upper abdominal, spinal and laparoscopic surgery were excluded. All patients had to be supine during surgery and the expected duration of general anaesthesia had to be at least 2 h.

No premedication was given. All patients were preoxygenated with pure oxygen for 3 min; thereafter, anaesthesia and neuromuscular block were induced by thiopental (thiopentone) 3 mg kg<sup>-1</sup>, fentanyl 3 µg kg<sup>-1</sup>, vecuronium 0.08 mg kg<sup>-1</sup> and isoflurane concentrations up to 1 MAC. After intubation of the trachea, anaesthesia was maintained with isoflurane concentrations of 0.5 and 1 MAC combined with bolus doses of fentanyl 1 µg kg<sup>-1</sup> as needed. Neuromuscular block was monitored continuously. Approximately 15% of the initial dose of vecuronium was administered if train-of-four (TOF) stimulation showed the third response.

After intubation, the lungs were ventilated with 40% oxygen in nitrogen using a Servo 900 B ventilator (Siemens-Elcoma, Solna, Sweden) in volume controlled mode at a tidal volume of 7–9 ml kg<sup>-1</sup> and a ventilatory frequency of 10–12 bpm. The respiratory cycle was divided into 25% active inspiration with a constant flow, 10% pause and 65% expiration. Initially, no PEEP was used. Minute ventilation was adjusted to maintain end-tidal carbon dioxide partial pressure within the range 4.0–4.7 kPa. After reaching a new steady state, the ventilator adjustments were confirmed by arterial blood-gas analysis.

After the start of surgery, the lungs were ventilated using the ventilator settings as described above for an initial control period of 30 min. Before patients were allocated randomly to one of the following three groups, arterial blood-gas measurements were obtained and baseline data recorded: in group ZEEP, patients continued with the same

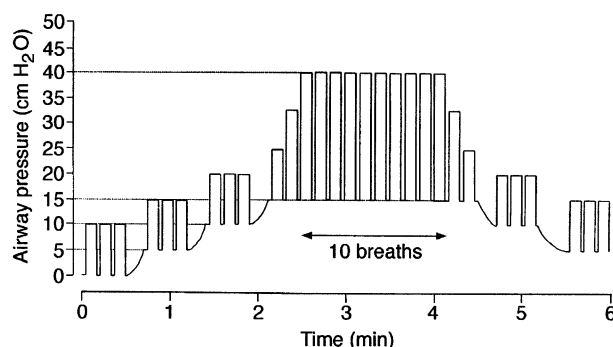

**Fig 1** Schematic representation of the 'alveolar recruitment strategy': PEEP is incremented in three steps of 5 cm H<sub>2</sub>O each. The vertical rectangles represent tidal breathing with a tidal volume of 7–9 ml kg<sup>-1</sup> body weight at a ventilatory frequency of 8 bpm. At a PEEP of 15 cm H<sub>2</sub>O, tidal volumes are increased until a maximum tidal volume of 18 ml kg<sup>-1</sup> or a peak airway pressure of 40 cm H<sub>2</sub>O is reached. These settings are applied for 10 breaths. Thereafter, tidal volumes are reduced to previous values. Finally, PEEP is set to a level of 5 cm H<sub>2</sub>O in two steps.

ventilator settings as during the control period (no PEEP was given); in group PEEP, after randomization, PEEP 5 cm H<sub>2</sub>O was added to the treatment regimen; in the strategy group, alveolar recruitment was achieved by applying steps 1–7 (below) sequentially. Figure 1 shows a schematic representation of the recruitment plan.

(1) For safety reasons, the working pressure of the ventilator was limited to 40 cm H<sub>2</sub>O.

(2) PEEP was increased in steps of 5 cm H<sub>2</sub>O up to a maximum of 15 cm H<sub>2</sub>O to obtain information on the haemodynamic state of the individual patient. If a patient's mean arterial pressure or heart rate changed by more than 20% compared with baseline, the intervention was stopped and normal saline 500 ml was given before the next recruitment attempt.

(3) Ventilatory frequency was reduced to 8 bpm.

(4) Pause time was increased to 20%.

(5) Tidal volume was increased until either a tidal volume of 18 ml kg<sup>-1</sup> or a peak inspiratory pressure of 40 cm H<sub>2</sub>O was reached. These latest settings were maintained for 10 breaths.

(6) Tidal volume was then reduced to baseline values.

(7) PEEP was decreased twice to obtain PEEP 5 cm H<sub>2</sub>O. The final ventilator settings were the same as in the PEEP group.

## Monitoring

A Capnomac Ultima (Datex Instruments, Corp., Helsinki, Finland) measured and displayed concentrations of carbon dioxide and oxygen in the ventilation gases. The device has a flow and pressure transducer which measured peak airway pressure, PEEP, expired tidal volume and minute ventilation at the distal end of the tracheal tube. Auto-PEEP was measured by clamping the expiratory limb of the ventilator breathing system just before the start of the next inspiration. To obtain reproducible conditions during measurement of lung mechanics that were independent

of resistance and auto-PEEP, ventilatory frequency was temporarily reduced to 7 bpm and the pause was prolonged to 20% to obtain an inspiratory pause of 1.7 s. Quasi-static compliance was then calculated by dividing expiratory tidal volume by the pressure difference between the plateau and total end-expiratory pressure (set-PEEP+auto-PEEP).

Systolic and diastolic arterial pressures were measured non-invasively by a Cardiocap II (Datex Instruments, Corp., Helsinki, Finland) and displayed together with SpO<sub>2</sub> on the monitor. Blood-gas samples were obtained via an 18-gauge radial artery cannula, inserted before induction of general anaesthesia under local anaesthesia.

Patients who received the recruitment manoeuvre had a portable chest x-ray within 12–24 h after surgery. All patients were followed until discharge from hospital for possible complications.

### Blood-gas analysis

After the initial 30-min control period (baseline), and at 40, 80 and 120 min, arterial blood samples were analysed for PaO<sub>2</sub>, SpO<sub>2</sub>, PaCO<sub>2</sub> and pH<sub>a</sub> by a blood-gas analyser (ABL 510; Radiometer, Copenhagen, Denmark). Samples were processed within 5 min and were corrected for body temperature. The investigators did not see the results of the blood-gas analysis until the end of the study.

### Statistical analysis

Descriptive statistics, intra- and inter-group analysis with repeated measures ANOVA were performed using INSTAT 2.0 (GraphPad Software, San Diego, CA, USA). In addition, the mixed model ANOVA of the SAS statistical package was used for oxygenation and compliance data (SAS Institute Inc., Cary, NC, USA).  $P < 0.05$  was taken as significant.

## Results

### Baseline characteristics

Between October 1996 and June 1997, 30 patients were allocated randomly to one of three treatment blocks. One patient in the recruitment group did not complete the 120-min study period but data up to 80 min were included in the analysis. Table 1 gives the baseline characteristics and type of surgery for the study population.

Table 2 shows the data obtained during the recruitment strategy. During recruitment, no cardiovascular changes were noted that required interruption of the procedure. Table 3 shows the effects of the treatments on PaO<sub>2</sub> and lung compliance.

### Lung mechanics

Baseline plateau pressures did not differ between groups. The recruitment and PEEP groups showed a significant difference in plateau and end-expiratory pressures compared

**Table 1** Patient baseline characteristics and type of surgery. Age (yr), BMI = body mass index (kg m<sup>-2</sup>). \*Anterior approach

| Group    | Age  | BMI  | Sex  | ASA   | Surgery                   |                      |
|----------|------|------|------|-------|---------------------------|----------------------|
| Strategy | 80   | 21   | F    | III   | Iliac-femoral bypass      |                      |
|          | 62   | 30   | M    | II    | Ureterectomy              |                      |
|          | 76   | 24   | F    | III   | Left hemicolectomy        |                      |
|          | 85   | 24   | F    | III   | Left hemicolectomy        |                      |
|          | 65   | 22   | F    | II    | Explorative laparotomy    |                      |
|          | 64   | 22   | F    | II    | Cervical discectomy*      |                      |
|          | 62   | 29   | F    | II    | Cervical discectomy*      |                      |
|          | 68   | 29   | F    | II    | Left hemicolectomy        |                      |
|          | 60   | 26   | M    | II    | Left hemicolectomy        |                      |
|          | 64   | 26   | M    | III   | Kidney transplant         |                      |
|          | Mean | 69   | 25   | 3M–7F | 4/III–6/II                |                      |
|          | SD   | 8.6  | 3.2  |       |                           |                      |
|          | PEEP | 81   | 26   | F     | III                       | Left hemicolectomy   |
| 67       |      | 25   | F    | III   | Left hemicolectomy        |                      |
| 60       |      | 21   | M    | II    | Right hemicolectomy       |                      |
| 75       |      | 23   | M    | II    | Left hemicolectomy        |                      |
| 71       |      | 22   | F    | II    | Left hemicolectomy        |                      |
| 60       |      | 30   | M    | II    | Cervical discectomy*      |                      |
| 68       |      | 27   | M    | III   | Cerebral tumour excision  |                      |
| 73       |      | 28   | M    | III   | Left hemicolectomy        |                      |
| 71       |      | 27   | F    | II    | Cervical discectomy*      |                      |
| 81       |      | 21   | M    | III   | Total colectomy           |                      |
| Mean     |      | 70.7 | 25.0 | 6M–4F | 5/III–5/II                |                      |
| SD       |      | 7.3  | 3.1  |       |                           |                      |
| ZEEP     |      | 78   | 26   | M     | III                       | Cervical discectomy* |
|          | 78   | 26   | F    | II    | Ceratoplasty              |                      |
|          | 61   | 25   | F    | III   | Clip cerebral aneurysm    |                      |
|          | 77   | 21   | F    | II    | Retinopathy               |                      |
|          | 60   | 23   | M    | II    | Clip cerebral aneurysm    |                      |
|          | 77   | 24   | F    | II    | Hartman operation         |                      |
|          | 74   | 23   | F    | II    | Right hemicolectomy       |                      |
|          | 75   | 25   | M    | III   | Segmental colon resection |                      |
|          | 80   | 21   | F    | III   | Hartman operation         |                      |
|          | 63   | 21   | F    | II    | Excision cerebral tumour  |                      |
|          | Mean | 72.3 | 23.5 | 3M–7F | 4/III–6/II                |                      |
|          | SD   | 7.7  | 2.0  |       |                           |                      |

**Table 2** Data obtained during the 'alveolar recruitment strategy' (mean (SD))

| Variable                                           |             |
|----------------------------------------------------|-------------|
| Peak pressure (cm H <sub>2</sub> O)                | 39.8 (0.8)  |
| Plateau pressure (cm H <sub>2</sub> O)             | 35.4 (0.7)  |
| PEEP (cm H <sub>2</sub> O)                         | 15.6 (1.6)  |
| Tidal volume (ml)                                  | 1064 (210)  |
| Compliance (ml cm H <sub>2</sub> O <sup>-1</sup> ) | 65.1 (26.8) |
| Ventilatory frequency (bpm)                        | 8.2 (0.4)   |
| SpO <sub>2</sub> (%)                               | 98.9 (0.6)  |
| End-tidal CO <sub>2</sub> (kPa)                    | 3.74 (0.38) |
| Heart rate (beat min <sup>-1</sup> )               | 75.3 (12.5) |
| Systolic arterial pressure (mm Hg)                 | 112 (14)    |
| Diastolic arterial pressure diastol (mm Hg)        | 68 (16)     |

with the ZEEP group; there were no differences between the recruitment and PEEP groups at 40, 80 or 120 min.

At 40, 80 and 120 min, compliance of the recruited lungs was different from baseline, but no such effect was seen after application of PEEP 5 cm H<sub>2</sub>O without prior recruitment. There was no time-dependent increase

**Table 3** Median, minimum and maximum values for  $P_{aO_2}$  and compliance. \*Significant difference from baseline at  $P < 0.05$  using a mixed model ANOVA. Dependent variables:  $P_{aO_2}$  and compliance at times 40, 80 and 120 min. Independent variables: baseline data as covariates. Within-patient factor: time (three levels); between-patient factor: group (three levels). We did not make any assumption about the structure of the within-patient (co)-variance matrix of the residuals

| Variable                         | Time    | ZEEP             | PEEP              | Recruitment       |
|----------------------------------|---------|------------------|-------------------|-------------------|
| $P_{aO_2}$ (kPa)                 | Basal   | 18.7 (12.8–26.3) | 13.0 (10.2–20.6)  | 20.4 (10.4–25.3)  |
|                                  | 40 min  | 18.5 (15.0–29.1) | 16.2 (12.2–21.4)* | 24.4 (13.3–35.2)* |
|                                  | 80 min  | 18.9 (14.6–27.6) | 19.3 (10.5–23.9)  | 25.5 (18.0–31.1)  |
|                                  | 120 min | 17.1 (14.9–26.2) | 20.3 (11.4–24.5)  | 25.4 (18.0–36.8)  |
| Compliance (cm H <sub>2</sub> O) | Basal   | 46.5 (34–76)     | 47.0 (35–68)      | 47.5 (28–55)      |
|                                  | 40 min  | 44.5 (26–70)     | 48.0 (37–66)      | 50.5 (29–74)*     |
|                                  | 80 min  | 44.0 (33–64)     | 47.0 (31–67)      | 57.0 (38–75)      |
|                                  | 120 min | 43.0 (34–72)     | 45.5 (36–68)      | 62.0 (29–68)      |

in compliance in the ZEEP group. No inter-group differences were seen.

### Blood-gas analysis

Recruitment increased arterial oxygenation compared with baseline. This persistent increase in  $P_{aO_2}$  was also significantly different from the two other groups. Applying PEEP 5 cm H<sub>2</sub>O after baseline measurements improved  $P_{aO_2}$  for the rest of the study but there were no inter-group differences in oxygenation between groups PEEP and ZEEP.  $P_{aCO_2}$  and pHa remained in the normal range and showed no significant differences between groups or within groups over time.  $P_{aO_2}$ -end-tidal carbon dioxide was always lower in recruited lungs but was significantly different (0.27 (0.35) vs 0.76 (0.31) kPa) ( $P < 0.01$ ) between the strategy group and ZEEP group only at 80 min.

### Monitoring

$SpO_2$ , end-tidal carbon dioxide concentration, heart rate, systolic and diastolic arterial pressures were within the normal range during the study. No complications occurred in any patient.

### Discussion

The ‘alveolar recruitment strategy’ increased arterial oxygenation during general anaesthesia. Treatment with PEEP 5 cm H<sub>2</sub>O alone, however, did not have the same effect on oxygenation. The increase in arterial oxygenation after the recruitment manoeuvre suggests a reversal of anaesthesia-induced atelectatic and the ventilation/perfusion inhomogeneity. This finding is compatible with the results of Hedenstierna and colleagues.<sup>3–6 10–14</sup>

Mechanisms of impaired oxygenation may also include collapse of alveoli, displacement of blood from the thorax to the abdomen, reduction in thoracic diameter and displacement and dysfunction of the diaphragm.<sup>15 16</sup> Methods to restore normal FRC and various re-expansion manoeuvres have been suggested. In 1978, Nunn and colleagues tested the detection and reversal of pulmonary absorption collapse in six healthy volunteers.<sup>17</sup> They found a correlation between the reduction in FRC with  $P_{aO_2}$  and densities on chest x-ray.

All of these changes were abolished by deep spontaneous inspirations. Rothen and colleagues reported experimental and clinical studies on the prevention and treatment of atelectasis.<sup>13 14 18 19</sup> They demonstrated in volunteers that peak inspiratory pressures of at least 40 cm H<sub>2</sub>O were needed to fully reverse anaesthesia-induced collapse of healthy lungs.<sup>13 14</sup>

Tokics and colleagues used CT and inert gases to investigate 13 patients undergoing general anaesthesia.<sup>4</sup> The subjects were examined while breathing spontaneously before and after induction of anaesthesia. After intubation of the trachea, ZEEP or PEEP 10 cm H<sub>2</sub>O was applied. The authors found, in contrast with our results, that PEEP 10 cm H<sub>2</sub>O reversed the lung densities on the CT scan but showed no effect on arterial oxygenation.<sup>4</sup> PEEP altered the relation between intrapulmonary shunt and atelectasis measured on the CT, and the authors suggested that the increased intra-thoracic pressures caused redistribution of blood flow towards the dependent atelectatic and shunting lung zones.<sup>4</sup> These results confirm earlier x-ray studies by Froese and Bryan, who found a PEEP-induced asymmetric displacement of the non-dependent diaphragm.<sup>20</sup>

To find a treatment for anaesthesia-induced atelectasis it may be useful to look at studies of mechanical ventilation performed in the diseased lung. Studies in the adult respiratory distress syndrome showed that collapsed alveoli can be opened even in these collapse-prone lungs.<sup>21–25</sup> These results encouraged our group to use the same treatment principles in healthy lungs with known atelectasis.<sup>8 9</sup> Therefore, an active re-expansion manoeuvre was combined with stabilization of the newly recruited alveoli by PEEP. After this intervention, arterial oxygenation increased immediately and remained high. During the 2-h study, the PEEP group showed a significant change in oxygenation which was, however, less pronounced than in the recruited group. Whether a longer investigation period would have revealed a significant increase is not known. These findings indicate that pressures beyond the opening pressure of collapsed alveoli are necessary to overcome the anaesthesia-induced collapse,<sup>13</sup> and that PEEP 5 cm H<sub>2</sub>O or more is required to prevent the newly recruited alveoli from collapsing.<sup>9 14</sup>

In our small study group, the low baseline oxygenation in the PEEP group compared with the strategy and ZEEP groups was most likely a result of chance alone, especially as no such initial difference between groups was found in the corresponding compliance values. It is not clear how this difference in  $Pa_{O_2}$  may have affected our results.

Although we intentionally applied 'high' airway pressures, no patient showed evidence of barotrauma on x-rays obtained after surgery and there were no pulmonary complications before hospital discharge. There are recommendations that plateau pressures greater than 35 cm H<sub>2</sub>O should be avoided and that alveoli should be stabilized with sufficient levels of PEEP.<sup>26</sup> In our study, mean plateau pressure during the intervention was 35.4 (0.7) cm H<sub>2</sub>O, that is at the limit proposed by the consensus conference on mechanical ventilation. In addition, we only applied increased inspiratory pressures for a total of 33.7 s. Our study regimen included application of PEEP 15 cm H<sub>2</sub>O during the recruitment process to reduce pressure amplitude. Tidal volumes did not exceed an average of 14.6 ml/kg body weight. In this way, we reduced large swings in alveolar surface area and shear forces that could damage the pulmonary surfactant system and alveolar structure.<sup>27-29</sup>

The recruitment manoeuvre can be performed with any conventional anaesthesia ventilator. For safety reasons, in our study the working pressure of the volume control ventilator was set to 40 cm H<sub>2</sub>O. This limited the maximum plateau and thus the effective recruiting pressure. Perhaps the oxygenation obtained in our study could have been greater had a recruitment pressure of 40 cm H<sub>2</sub>O or more been applied.<sup>13</sup> Ventilation by a pressure-limited mode, suggested by Lachmann and colleagues, could have filled opening alveoli more effectively.<sup>22</sup>

In summary, the 'alveolar recruitment strategy' is an efficient intervention to correct abnormalities in gas exchange during general anaesthesia. This recruitment manoeuvre was easy to perform and showed no complications in this small number of patients with healthy lungs. Further studies are needed to address the postoperative benefits and possible side effects of our recruitment manoeuvre.

## Acknowledgements

We thank Laraine Visser-Isles for English language editing of the manuscript. We also thank Dr Elsieo Turchetto for constructive criticism and Dr Paul Mulder for statistical modelling.

## References

- 1 Sykes MK, Young WE, Robinson BE. Oxygenation during anaesthesia with controlled ventilation. *Br J Anaesth* 1965; **37**: 314-25
- 2 Bendixen HH, Hedley-Whyte J, Laver MB. Impaired oxygenation in surgical patients during general anaesthesia with controlled ventilation. *N Engl J Med* 1963; **269**: 991-6
- 3 Strandberg A, Tokics L, Brismar B, Lundquist H, Hedenstierna G. Constitutional factors promoting development of atelectasis during anaesthesia. *Acta Anaesthesiol Scand* 1987; **31**: 21-4
- 4 Tokics L, Hedenstierna G, Strandberg A, Brismar B, Lundquist H. Lung collapse and gas exchange during general anaesthesia: Effects of spontaneous breathing, muscle paralysis, and positive end-expiratory pressure. *Anesthesiology* 1987; **66**: 157-67
- 5 Hedenstierna G, Tokics L, Strandberg A, Lundquist H, Brismar B. Correlation of gas exchange impairment to development of atelectasis during anaesthesia and muscle paralysis. *Acta Anaesthesiol Scand* 1986; **30**: 183-91
- 6 Brismar B, Hedenstierna G, Lundquist H, et al. Pulmonary densities during anaesthesia with muscular relaxation—A proposal of atelectasis. *Anesthesiology* 1985; **62**: 422-8
- 7 Hedenstierna G, Lundquist H, Lundh B, et al. Pulmonary densities during anaesthesia. An experimental study on lung morphology and gas exchange. *Eur Respir J* 1989; **2**: 528-35
- 8 Lachmann B. Open up the lung and keep the lung open. *Intensive Care Med* 1992; **118**: 319-21
- 9 Böhm S, Lachmann B. Pressure-control ventilation. Putting a mode into perspective. *Int J Intensive Care* 1996; **3**: 12-27
- 10 Gunnarsson L, Tokics L, Gustavsson H, Hedenstierna G. Influence of age on atelectasis formation and gas exchange impairment during general anaesthesia. *Br J Anaesth* 1991; **66**: 423-32
- 11 Lindberg P, Gunnarsson L, Tokics L, et al. Atelectasis and lung function in the postoperative period. *Acta Anaesthesiol Scand* 1992; **36**: 546-53
- 12 Klingstedt C, Hedenstierna G, Baehrendtz S, et al. Ventilation-perfusion relationships and atelectasis formation in the supine and lateral positions during conventional mechanical and differential ventilation. *Acta Anaesthesiol Scand* 1990; **34**: 421-9
- 13 Rothen HU, Sporre B, Engberg G, Wegenius G, Hedenstierna G. Re-expansion of atelectasis during general anaesthesia: a computed tomography study. *Br J Anaesth* 1993; **71**: 788-95
- 14 Rothen HU, Sporre B, Wegenius G, Hedenstierna G. Reexpansion of atelectasis during general anaesthesia may have a prolonged effect. *Acta Anaesthesiol Scand* 1995; **39**: 118-25
- 15 Hedenstierna G, Strandberg A, Brismar B, et al. Functional residual capacity, thoracoabdominal dimensions, and central blood volume during general anaesthesia with muscle paralysis and mechanical ventilation. *Anesthesiology* 1985; **62**: 247-54
- 16 Krayer S, Rehder K, Vettermann J, Didier EP, Ritman EL. Position and motion of the diaphragm during anaesthesia-paralysis. *Anesthesiology* 1989; **70**: 891-8
- 17 Nunn JF, Williams IP, Jones JG, et al. Detection and reversal of pulmonary absorption collapse. *Br J Anaesth* 1978; **50**: 91-100.
- 18 Rothen HU, Sporre B, Engberg G, et al. Atelectasis and pulmonary shunting during induction of general anaesthesia—can they be avoided? *Acta Anaesthesiol Scand* 1996; **40**: 524-9
- 19 Rothen HU, Sporre B, Engberg G, et al. Prevention of atelectasis during general anaesthesia. *Lancet*; **345**: 1387-91
- 20 Froese AB, Bryan CA. Effects of anaesthesia and paralysis on diaphragmatic mechanics in man. *Anesthesiology* 1974; **41**: 242-55
- 21 Kumar A, Falke K, Geffin B, et al. Continuous positive-pressure ventilation in acute respiratory failure. *N Engl J Med* 1970; **24**: 1430-6
- 22 Lachmann B, Danzmann E, Haendly B, Jonson B. Ventilator settings and gas exchange in respiratory distress syndrome. In: Prakash O, ed. *Applied Physiology in Clinical Respiratory Care*. The Hague: Nijhoff, 1982; 141-76
- 23 Bond D, Froese B. Volume recruitment manoeuvres are less deleterious than persistent low lung volumes in the atelectasis prone rabbit lung during high-frequency oscillation. *Crit Care Med* 1993; **21**: 402-12

- 24** Amato MBP, Barbas CSV, Medeiros DM, *et al.* Beneficial effects of the 'open lung approach' with low distending pressures in acute respiratory distress syndrome. *Am J Respir Crit Care Med* 1995; **152**: 1835–46.
- 25** Amato MBP, Barbas CSV, Medeiros DM, *et al.* Effect of a protective-ventilation strategy on mortality in the respiratory distress syndrome. *N Engl J Med* 1998; **338**: 347–54
- 26** Slutsky AS. Mechanical ventilation. ACCP Consensus Conference. *Chest* 1993; **104**: 1833–59
- 27** Verbrugge SJC, Böhm SH, Gommers D, Zimmerman LJI, Lachmann B. Surfactant impairment after mechanical ventilation with large alveolar surface area change and effects of positive end-expiratory pressure. *Br J Anaesth* 1998; **80**: 360–4
- 28** Muscedere JG, Mullen JB, Gan K, Slutsky AS. Tidal ventilation at low airway pressure can augment lung injury. *Am J Respir Crit Care Med* 1994; **149**: 1327–34
- 29** Dreyfuss D, Saumon G. Role of tidal volume, FRC, and end-inspiratory volume in the development of pulmonary edema following mechanical ventilation. *Am Rev Respir Dis* 1993; **148**: 1194–203
